# Supplementary material for: Structural insight into imidazopyridines and benzimidazoles: the importance of the hydrogen bond, π-stacking interactions and intramolecular charge transfer effect for fluorescence
Source: Royal Society of Chemistry journal article supplement (doi:10.1039/d4ce00714j), 2024-01-01
Supplement: d4ce00714j1.pdf [file d4ce00714j1.pdf]

## Supporting Information

### **Structural insight into imidazopyridines and benzimidazoles: the importance of hydrogen bond, $\pi$ -stacking interactions and intramolecular charge transfer effect for fluorescence**

Haonan Li,<sup>a</sup> Chenping Gao,<sup>a</sup> Zhibin Li,<sup>a</sup> Yanchun Guo,<sup>\*,a</sup> Shuxia Cao,<sup>a</sup>  
Yufen Zhao<sup>a,b</sup>

<sup>a</sup> College of Chemistry, Zhengzhou University, Zhengzhou, Henan 450001, China

<sup>b</sup> Institute of Drug Discovery Technology, Ningbo University, Ningbo, Zhejiang 315211, China

# Table of Contents

|                                                                                                                               |           |
|-------------------------------------------------------------------------------------------------------------------------------|-----------|
| <b>1. Experimental Characterization Data and Copies of NMR Spectra for the Products(2a, 2b, 3a and 3b) .....</b>              | <b>3</b>  |
| <b>2. X-ray Crystal Structure Determination of the Products (2a, 2b, 3a and 3b) and Hirshfeld Surface (HS) Analysis .....</b> | <b>10</b> |
| <b>3. Frontier molecular orbitals of compound 1a, 1b, 1c, 2a, 2b, 3a and 3b.....</b>                                          | <b>26</b> |
| <b>4. Absorption and emission spectra of compound 1a, 1b, 1c, 2a, 2b, 3a and 3b in solution.....</b>                          | <b>27</b> |

## 1. Experimental Characterization Data for the Products

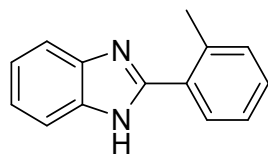

### 2-(o-tolyl)-1H-benzo[d]imidazole (2a):

From benzene-1,2-diamine (1 mmol, 1 eq.) and 2-methylbenzaldehyde (1.75 mmol, 1.75 eq.), following the general procedure C, the title compound (174.7 mg, 84%) was obtained as a faint yellow solid.  $R_f = 0.3$  (petroleum ether/ethyl acetate = 20:1 - 5:1).  $^1\text{H NMR}$  (400 MHz,  $\text{DMSO-d}_6$ )  $\delta$ : 7.82-7.73 (m, 1H), 7.63 (s, 2H), 7.39 (s, 3H), 7.22 (s, 2H), 2.62 (s, 3H);  $^{13}\text{C NMR}$  (101 MHz,  $\text{DMSO-d}_6$ )  $\delta$ : 152.41, 137.49, 131.72, 130.53, 129.92, 129.78, 126.42, 122.35, 21.50.

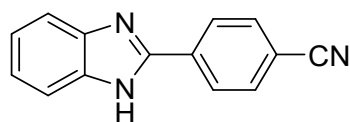

### 4-(1H-benzo[d]imidazol-2-yl)benzonitrile (2b):

From benzene-1,2-diamine (1 mmol, 1 eq.) and 4-formyl benzonitrile (1.75 mmol, 1.75 eq.), following the general procedure C, the title compound (210.2 mg, 96%) was obtained as a faint yellow solid.  $R_f = 0.3$  (petroleum ether/ethyl acetate = 20:1 - 5:1).  $^1\text{H NMR}$  (400 MHz,  $\text{DMSO-d}_6$ )  $\delta$ : 8.34 (d,  $J = 7.6$  Hz, 2H), 8.01 (d,  $J = 7.3$  Hz, 2H), 7.65 (s, 2H), 7.32-7.20 (m, 2H);  $^{13}\text{C NMR}$  (101 MHz,  $\text{DMSO-d}_6$ )  $\delta$ : 149.83, 136.47, 134.71, 133.40, 133.24, 133.19, 130.27, 127.56, 127.43, 123.27, 119.08, 112.35.

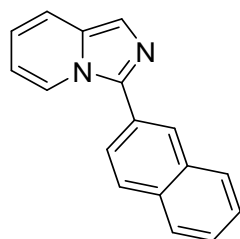

### 3-(naphthalen-2-yl)imidazo[1,5-a]pyridine (3a):

From 2-pyridinemethanamine (0.8 mmol, 2 eq.) and 2-naphthaldehyde (0.4 mmol, 1 eq.), following the general procedure A, the title compound (71.2 mg, 73%) was obtained as a faint yellow solid.  $R_f = 0.3$  (petroleum ether/ethyl acetate = 20:1 - 5:1).  $^1\text{H NMR}$  (400 MHz,  $\text{CDCl}_3$ )  $\delta$ : 8.41 (d,  $J = 7.3$  Hz, 1H), 8.29 (s, 1H), 8.04-7.91 (m, 4H), 7.64 (s, 1H), 7.58-7.52 (m, 3H), 6.82-6.73 (m, 1H), 6.62 (t,  $J = 6.8$  Hz, 1H);  $^{13}\text{C NMR}$  (101 MHz,  $\text{CDCl}_3$ )  $\delta$ : 138.28, 133.37, 133.15, 131.83, 128.81, 128.24, 127.85, 126.69, 126.66, 126.63, 125.72, 121.51, 120.96, 118.91, 113.25.

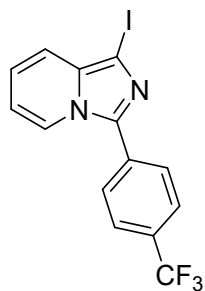

**1-iodo-3-(4-(trifluoromethyl)phenyl)imidazo[1,5-a]pyridine (3b):**

From 2-pyridinemethanamine (0.8 mmol, 1 eq.) and 4-(trifluoromethyl)benzaldehyde (1.6 mmol, 2 eq.), following the general procedure B, the title compound (304.2 mg, 98%) was obtained as a faint yellow solid. R<sub>f</sub> = 0.3 (petroleum ether/ethyl acetate = 15:1 – 3:1). <sup>1</sup>H NMR (400 MHz, CDCl<sub>3</sub>) δ: 8.09 (d, *J* = 7.3 Hz, 1H), 7.75 (d, *J* = 8.2 Hz, 2H), 7.61 (d, *J* = 8.2 Hz, 2H), 7.23 (d, *J* = 9.2 Hz, 1H), 6.71 (dd, *J* = 9.3, 6.4 Hz, 1H), 6.54 (t, *J* = 6.8 Hz, 1H); <sup>13</sup>C NMR (101 MHz, CDCl<sub>3</sub>) δ: 138.74, 133.98, 132.72, 130.48 (d, *J* = 32.6 Hz), 127.80, 125.94 (q, *J* = 3.8 Hz), 123.90 (d, *J* = 272.3 Hz), 121.56, 120.83, 119.10, 114.71, 75.11; <sup>19</sup>F NMR (376 MHz, CDCl<sub>3</sub>) δ: -62.61.

## Copies of NMR Spectra for Compounds

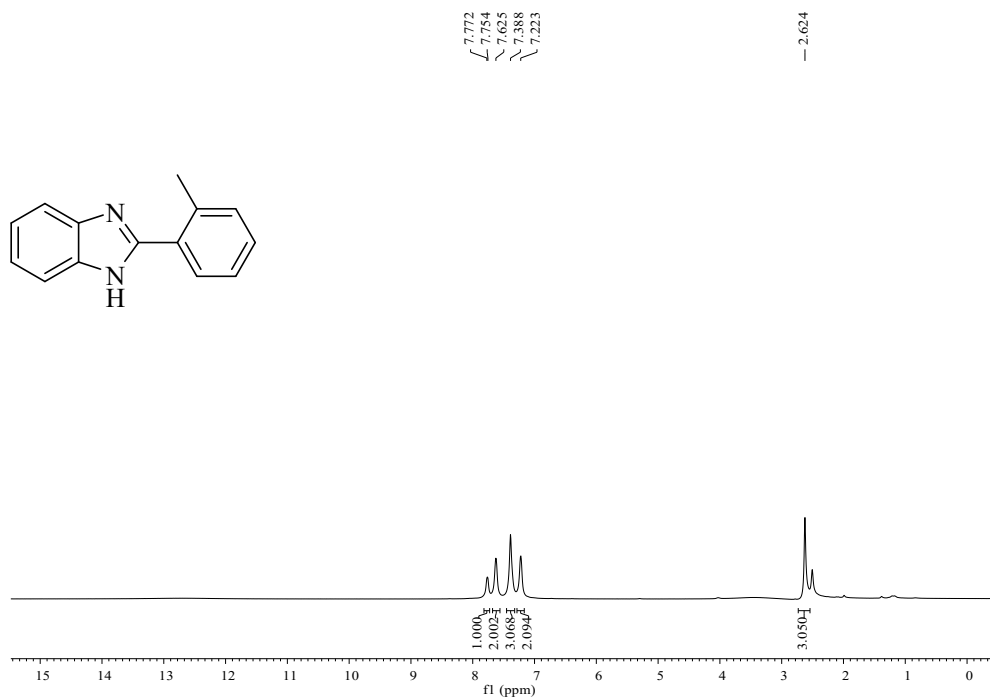

$^1\text{H}$  NMR Spectrum of **2a**

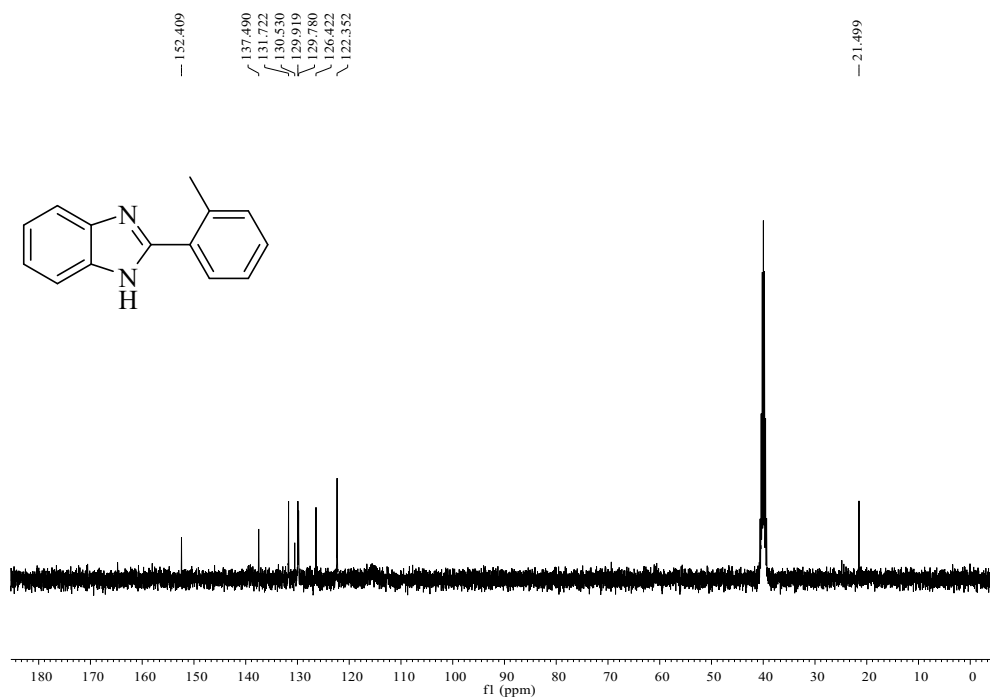

$^{13}\text{C}$  NMR Spectrum of **2a**

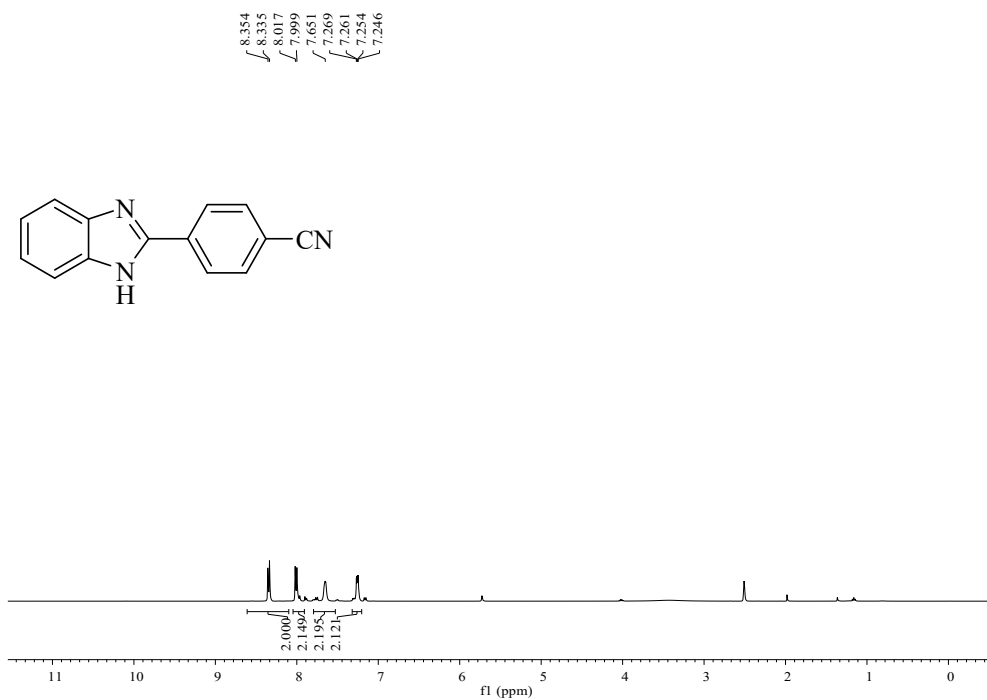

<sup>1</sup>H NMR Spectrum of **2b**

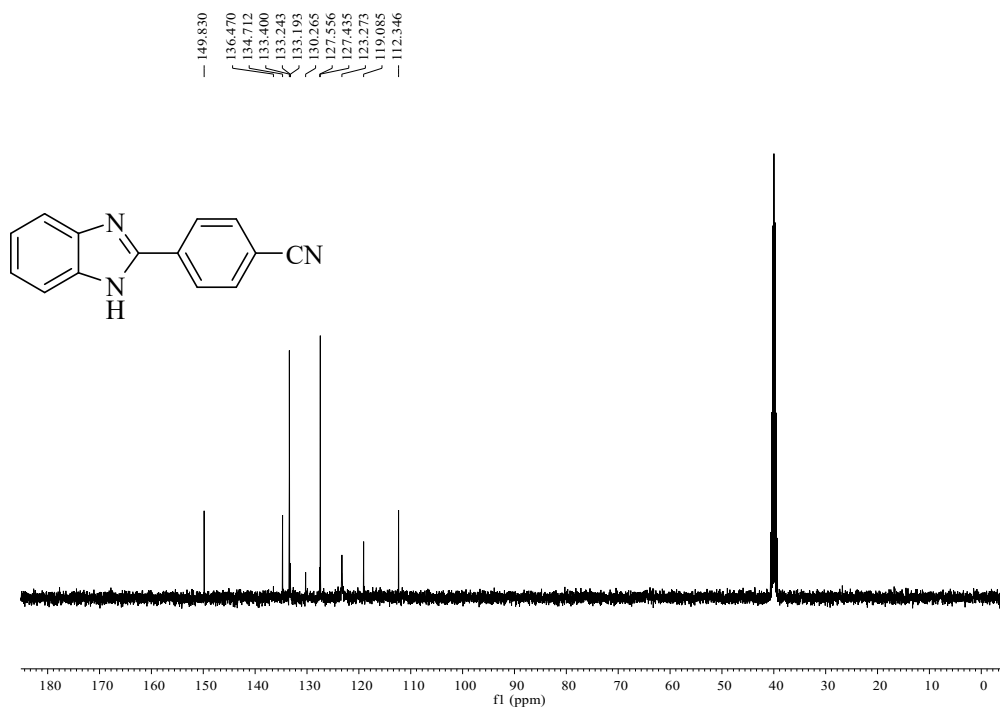

<sup>13</sup>C NMR Spectrum of **2b**

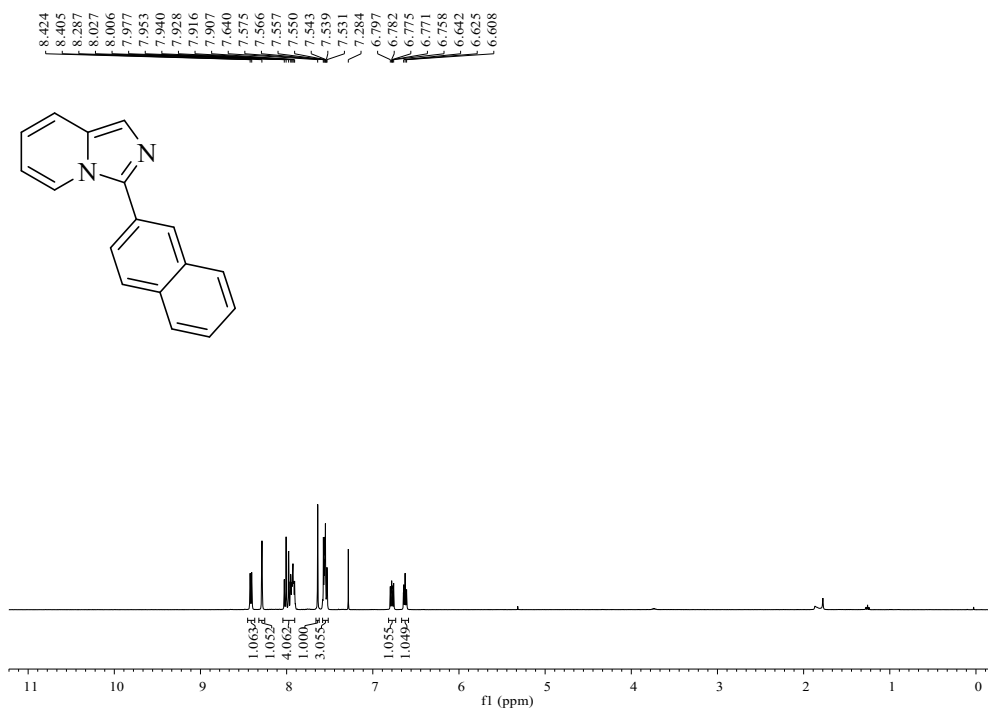

<sup>1</sup>H NMR Spectrum of **3a**

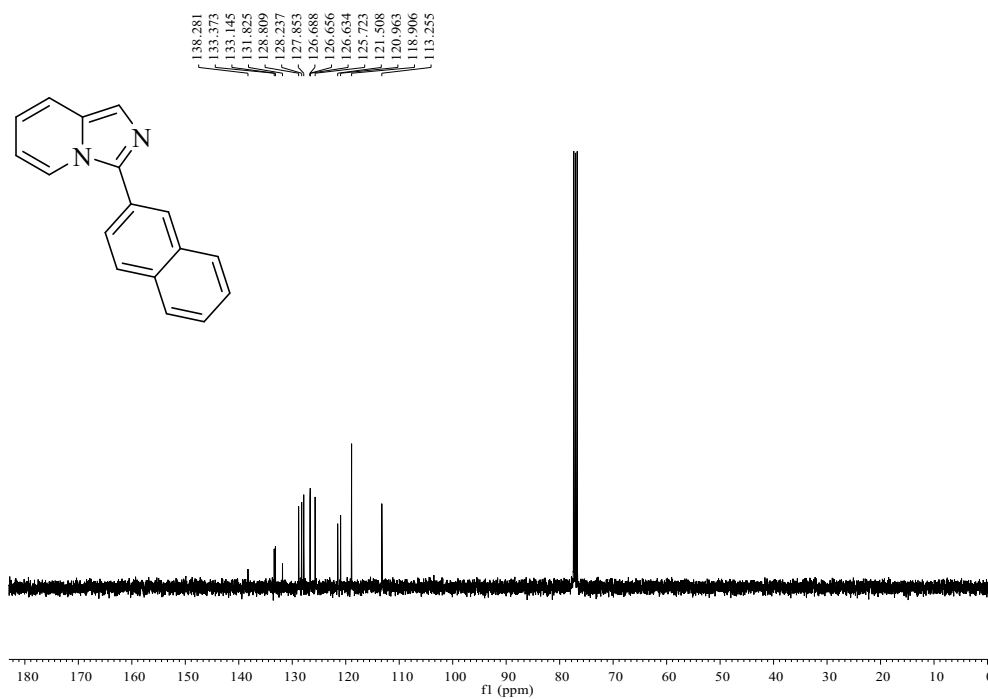

<sup>13</sup>C NMR Spectrum of **3a**

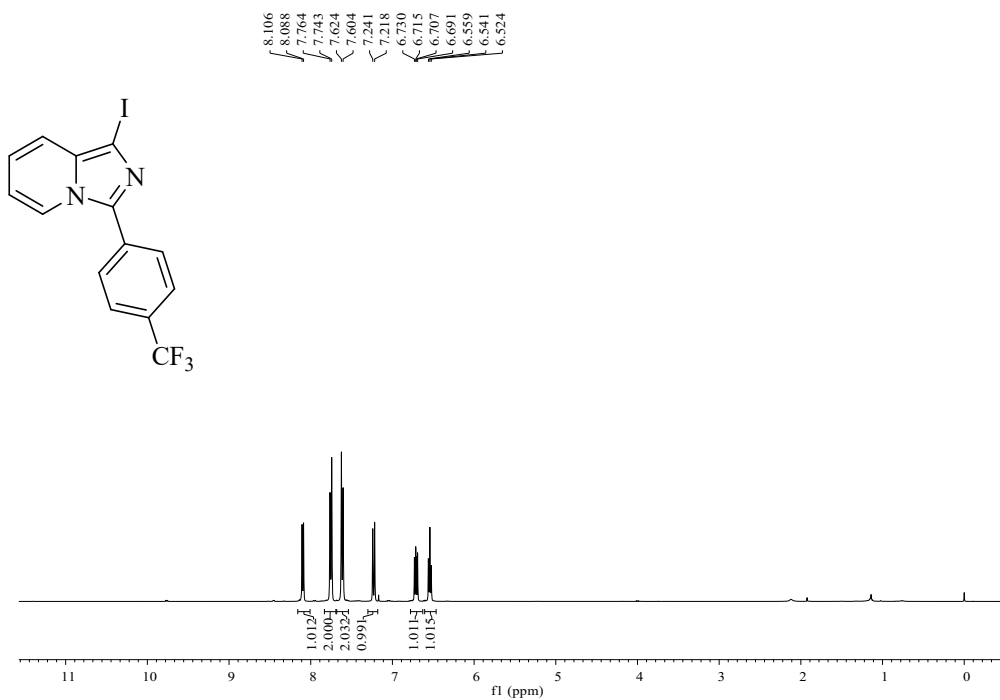

<sup>1</sup>H NMR Spectrum of **3b**

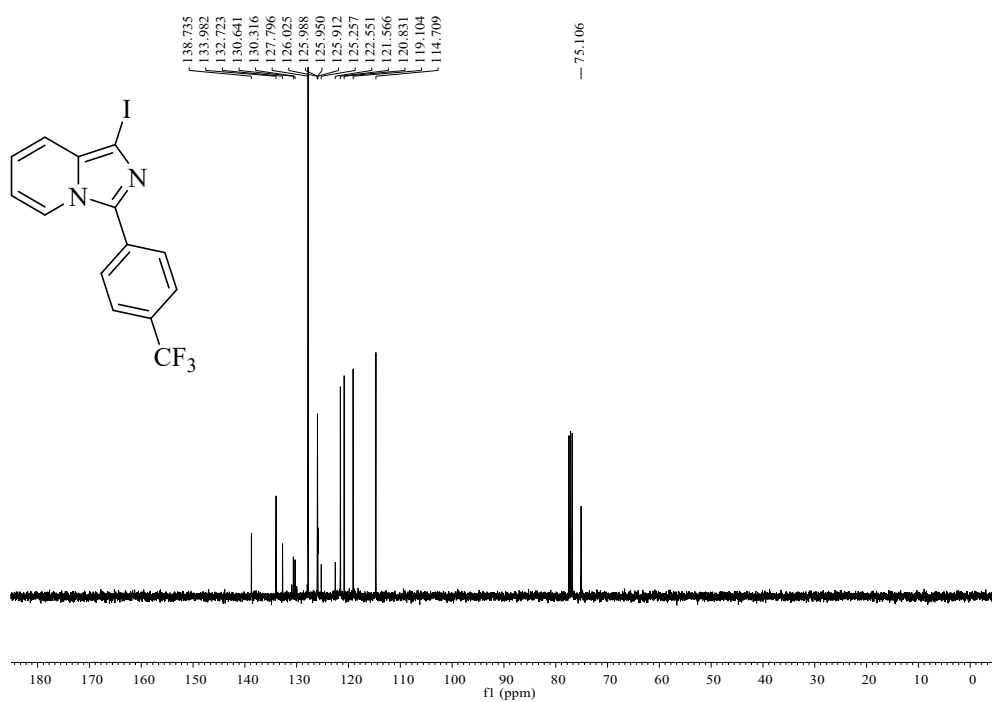

<sup>13</sup>C NMR Spectrum of **3b**



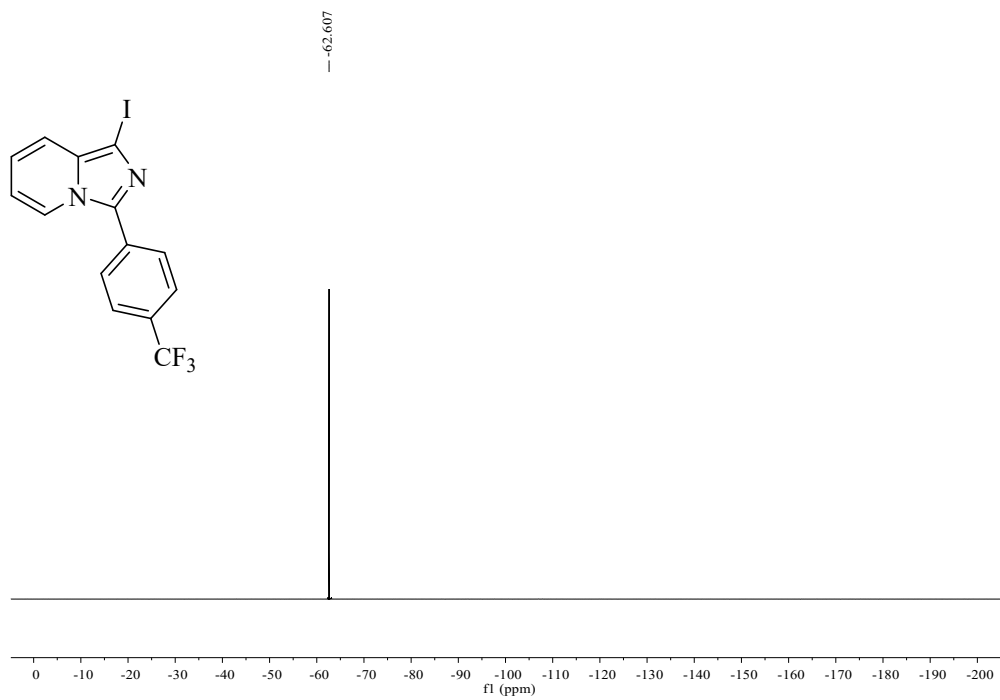

## **2. X-ray Crystal Structure Determination of the Products (2a, 2b, 3a, and 3b) and Hirshfeld Surface (HS) Analysis**

To grow the crystals used to collect the X-ray data for **2a**, **2b**, **3a**, and **3b** the following method was used: the sample was dissolved with 3 mL CH<sub>3</sub>OH in a small vial, which was kept aside at room temperature to obtain crystals.

**Table S1.** Crystallographic data for compounds **2a**

| Project                                     | Parameter                                                     |
|---------------------------------------------|---------------------------------------------------------------|
| Identification code                         | 202210190                                                     |
| Empirical formula                           | C <sub>14</sub> H <sub>12</sub> N <sub>2</sub>                |
| Formula weight                              | 208.26                                                        |
| Temperature/K                               | 293(2)                                                        |
| Crystal system                              | tetragonal                                                    |
| Space group                                 | P4 <sub>1</sub>                                               |
| a/Å                                         | 8.8835(11)                                                    |
| b/Å                                         | 8.8835(11)                                                    |
| c/Å                                         | 14.400(2)                                                     |
| α/°                                         | 90                                                            |
| β/°                                         | 90                                                            |
| γ/°                                         | 90                                                            |
| Volume/Å <sup>3</sup>                       | 1136.4(3)                                                     |
| Z                                           | 4                                                             |
| ρ <sub>calc</sub> /cm <sup>3</sup>          | 1.217                                                         |
| μ/mm <sup>-1</sup>                          | 0.568                                                         |
| F(000)                                      | 440.0                                                         |
| Crystal size/mm <sup>3</sup>                | 0.22 × 0.09 × 0.07                                            |
| Radiation                                   | CuKα (λ = 1.54184)                                            |
| 2θ range for data collection/°              | 9.956 to 133.894                                              |
| Index ranges                                | -10 ≤ h ≤ 10, -10 ≤ k ≤ 10, -15 ≤ l ≤ 17                      |
| Reflections collected                       | 7582                                                          |
| Independent reflections                     | 1882 [R <sub>int</sub> = 0.0432, R <sub>sigma</sub> = 0.0385] |
| Data/restraints/parameters                  | 1882/1/151                                                    |
| Goodness-of-fit on F <sup>2</sup>           | 1.051                                                         |
| Final R indexes [I ≥ 2σ (I)]                | R <sub>1</sub> = 0.0392, wR <sub>2</sub> = 0.1048             |
| Final R indexes [all data]                  | R <sub>1</sub> = 0.0508, wR <sub>2</sub> = 0.1181             |
| Largest diff. peak/hole / e Å <sup>-3</sup> | 0.13/-0.12                                                    |

**Table S2.** Bond lengths for single crystal **2a**

| Atom      | Length/Å | Atom        | Length/Å |
|-----------|----------|-------------|----------|
| N(1)-C(6) | 1.376(4) | C(5)-C(6)   | 1.399(5) |
| N(1)-C(7) | 1.369(4) | C(7)-C(8)   | 1.479(4) |
| N(2)-C(5) | 1.398(4) | C(8)-C(9)   | 1.386(5) |
| N(2)-C(7) | 1.319(4) | C(8)-C(13)  | 1.401(6) |
| C(1)-C(2) | 1.379(6) | C(9)-C(10)  | 1.394(6) |
| C(1)-C(6) | 1.384(5) | C(10)-C(11) | 1.378(8) |
| C(2)-C(3) | 1.393(7) | C(11)-C(12) | 1.375(8) |
| C(3)-C(4) | 1.371(6) | C(12)-C(13) | 1.396(6) |
| C(4)-C(5) | 1.392(5) | C(13)-C(14) | 1.498(6) |

**Table S3.** Bond angles for single crystal **2a**

| Atom           | Angle/°  | Atom              | Angle/°  |
|----------------|----------|-------------------|----------|
| C(7)-N(1)-C(6) | 107.4(3) | N(2)-C(7)-N(1)    | 112.5(3) |
| C(7)-N(2)-C(5) | 105.0(3) | N(2)-C(7)-C(8)    | 126.3(3) |
| C(2)-C(1)-C(6) | 116.6(4) | C(9)-C(8)-C(7)    | 117.9(3) |
| C(1)-C(2)-C(3) | 122.0(4) | C(9)-C(8)-C(13)   | 120.2(3) |
| C(4)-C(3)-C(2) | 121.2(4) | C(13)-C(8)-C(7)   | 121.9(3) |
| C(3)-C(4)-C(5) | 118.1(4) | C(8)-C(9)-C(10)   | 121.0(5) |
| N(2)-C(5)-C(6) | 109.7(3) | C(11)-C(10)-C(9)  | 119.2(5) |
| C(4)-C(5)-N(2) | 130.2(3) | C(12)-C(11)-C(10) | 119.9(4) |
| C(4)-C(5)-C(6) | 120.0(3) | C(11)-C(12)-C(13) | 122.2(5) |
| N(1)-C(6)-C(1) | 132.5(3) | C(8)-C(13)-C(14)  | 122.9(3) |
| N(1)-C(6)-C(5) | 105.4(3) | C(12)-C(13)-C(8)  | 117.6(4) |
| C(1)-C(6)-C(5) | 122.2(3) | C(12)-C(13)-C(14) | 119.6(4) |
| N(1)-C(7)-C(8) | 121.1(3) |                   |          |

**Table S4.** Crystallographic data for compounds **2b**

| Project                                     | Parameter                                                     |
|---------------------------------------------|---------------------------------------------------------------|
| Identification code                         | LQJ-1                                                         |
| Empirical formula                           | C <sub>14</sub> H <sub>9</sub> N <sub>3</sub>                 |
| Formula weight                              | 219.24                                                        |
| Temperature/K                               | 300.00                                                        |
| Crystal system                              | monoclinic                                                    |
| Space group                                 | P2 <sub>1</sub> /n                                            |
| a/Å                                         | 7.2378(10)                                                    |
| b/Å                                         | 11.8288(14)                                                   |
| c/Å                                         | 12.7296(17)                                                   |
| $\alpha$ /°                                 | 90                                                            |
| $\beta$ /°                                  | 92.175(5)                                                     |
| $\gamma$ /°                                 | 90                                                            |
| Volume/Å <sup>3</sup>                       | 1089.1(2)                                                     |
| Z                                           | 4                                                             |
| $\rho$ calcd/cm <sup>3</sup>                | 1.337                                                         |
| $\mu$ /mm <sup>-1</sup>                     | 0.083                                                         |
| F(000)                                      | 456.0                                                         |
| Crystal size/mm <sup>3</sup>                | 0.2 × 0.2 × 0.2                                               |
| Radiation                                   | MoK $\alpha$ ( $\lambda$ = 0.71073)                           |
| 2 $\theta$ range for data collection/°      | 6.374 to 50                                                   |
| Index ranges                                | -8 ≤ h ≤ 8, -14 ≤ k ≤ 14, -15 ≤ l ≤ 15                        |
| Reflections collected                       | 27964                                                         |
| Independent reflections                     | 1928 [R <sub>int</sub> = 0.0529, R <sub>sigma</sub> = 0.0185] |
| Data/restraints/parameters                  | 1928/0/154                                                    |
| Goodness-of-fit on F <sup>2</sup>           | 1.107                                                         |
| Final R indexes [ $I \geq 2\sigma(I)$ ]     | R <sub>1</sub> = 0.0356, wR <sub>2</sub> = 0.0874             |
| Final R indexes [all data]                  | R <sub>1</sub> = 0.0455, wR <sub>2</sub> = 0.0935             |
| Largest diff. peak/hole / e Å <sup>-3</sup> | 0.10/-0.18                                                    |

**Table S5.** Bond lengths for single crystal **2b**

| Atom       | Length/Å   | Atom        | Length/Å |
|------------|------------|-------------|----------|
| N(1)-C(2)  | 1.3769(18) | C(8)-C(9)   | 1.391(2) |
| N(1)-C(7)  | 1.3670(18) | C(11)-C(14) | 1.441(2) |
| N(2)-C(3)  | 1.3845(18) | C(11)-C(12) | 1.389(2) |
| N(2)-C(7)  | 1.3199(18) | C(11)-C(10) | 1.386(2) |
| N(3)-C(14) | 1.1424(18) | C(4)-C(5)   | 1.375(2) |
| C(2)-C(3)  | 1.400(2)   | C(13)-C(12) | 1.375(2) |
| C(2)-C(1)  | 1.392(2)   | C(1)-C(6)   | 1.376(2) |
| C(3)-C(4)  | 1.398(2)   | C(10)-C(9)  | 1.380(2) |
| C(7)-C(8)  | 1.4699(19) | C(5)-C(6)   | 1.398(2) |
| C(8)-C(13) | 1.393(2)   |             |          |

**Table S6.** Bond angles for single crystal **2b**

| Atom            | Angle/°    | Atom              | Angle/°    |
|-----------------|------------|-------------------|------------|
| C(7)-N(1)-C(2)  | 107.17(11) | C(9)-C(8)-C(13)   | 118.80(13) |
| C(7)-N(2)-C(3)  | 104.90(12) | C(12)-C(11)-C(14) | 118.74(13) |
| N(1)-C(2)-C(3)  | 105.05(12) | C(10)-C(11)-C(14) | 121.28(14) |
| N(1)-C(2)-C(1)  | 132.56(13) | C(10)-C(11)-C(12) | 119.98(13) |
| C(1)-C(2)-C(3)  | 122.39(13) | C(5)-C(4)-C(3)    | 117.93(14) |
| N(2)-C(3)-C(2)  | 110.23(12) | N(3)-C(14)-C(11)  | 177.15(17) |
| N(2)-C(3)-C(4)  | 130.01(13) | C(12)-C(13)-C(8)  | 120.73(14) |
| C(4)-C(3)-C(2)  | 119.75(13) | C(13)-C(12)-C(11) | 119.94(14) |
| N(1)-C(7)-C(8)  | 123.86(12) | C(6)-C(1)-C(2)    | 116.72(14) |
| N(2)-C(7)-N(1)  | 112.64(12) | C(9)-C(10)-C(11)  | 119.77(14) |
| N(2)-C(7)-C(8)  | 123.48(13) | C(10)-C(9)-C(8)   | 120.78(14) |
| C(13)-C(8)-C(7) | 118.41(13) | C(4)-C(5)-C(6)    | 121.50(15) |
| C(9)-C(8)-C(7)  | 122.79(13) | C(1)-C(6)-C(5)    | 121.69(14) |

**Table S7.** Crystallographic data for compounds **3a**

| Project                                     | Parameter                                                     |
|---------------------------------------------|---------------------------------------------------------------|
| Identification code                         | 202209166                                                     |
| Empirical formula                           | C <sub>17</sub> H <sub>12</sub> N <sub>2</sub>                |
| Formula weight                              | 244.29                                                        |
| Temperature/K                               | 293(2)                                                        |
| Crystal system                              | orthorhombic                                                  |
| Space group                                 | P2 <sub>1</sub> 2 <sub>1</sub> 2 <sub>1</sub>                 |
| a/Å                                         | 7.4481(3)                                                     |
| b/Å                                         | 12.5608(7)                                                    |
| c/Å                                         | 13.0832(8)                                                    |
| α/°                                         | 90                                                            |
| β/°                                         | 90                                                            |
| γ/°                                         | 90                                                            |
| Volume/Å <sup>3</sup>                       | 1223.99(12)                                                   |
| Z                                           | 4                                                             |
| ρ <sub>calc</sub> /cm <sup>3</sup>          | 1.326                                                         |
| μ/mm <sup>-1</sup>                          | 0.615                                                         |
| F (000)                                     | 512.0                                                         |
| Crystal size/mm <sup>3</sup>                | 0.18 × 0.07 × 0.06                                            |
| Radiation                                   | CuKα (λ = 1.54184)                                            |
| 2θ range for data collection/°              | 9.762 to 141.976                                              |
| Index ranges                                | -9 ≤ h ≤ 8, -15 ≤ k ≤ 15, -16 ≤ l ≤ 15                        |
| Reflections collected                       | 6812                                                          |
| Independent reflections                     | 2344 [R <sub>int</sub> = 0.0345, R <sub>sigma</sub> = 0.0372] |
| Data/restraints/parameters                  | 2344/0/173                                                    |
| Goodness-of-fit on F <sup>2</sup>           | 1.059                                                         |
| Final R indexes [I >= 2σ (I)]               | R <sub>1</sub> = 0.0401, wR <sub>2</sub> = 0.0968             |
| Final R indexes [all data]                  | R <sub>1</sub> = 0.0507, wR <sub>2</sub> = 0.1043             |
| Largest diff. peak/hole / e Å <sup>-3</sup> | 0.11/-0.12                                                    |

**Table S8.** Bond lengths for single crystal **3a**

| Atom       | Length/Å | Atom        | Length /Å |
|------------|----------|-------------|-----------|
| N(1)-C(1)  | 1.380(4) | C(8)-C(9)   | 1.423(4)  |
| N(1)- C(5) | 1.400(4) | C(8)- C(13) | 1.374(4)  |
| N(1)- C(7) | 1.377(3) | C(9)- C(10) | 1.358(4)  |
| N(2)- C(6) | 1.357(4) | C(10)-C(11) | 1.413(5)  |
| N(2)-C(7)  | 1.324(4) | C(11)-C(12) | 1.422(4)  |
| C(1)- C(2) | 1.346(4) | C(11)-C(14) | 1.416(4)  |
| C(2)- C(3) | 1.422(5) | C(12)-C(13) | 1.418(4)  |
| C(3)- C(4) | 1.347(5) | C(12)-C(17) | 1.412(4)  |
| C(4)- C(5) | 1.411(4) | C(14)-C(15) | 1.353(5)  |
| C(5)- C(6) | 1.375(4) | C(15)-C(16) | 1.410(5)  |
| C(7)- C(8) | 1.464(4) | C(16)-C(17) | 1.370(4)  |

**Table S9.** Bond angles for single crystal **3a**

| Atom           | Angle/°  | Atom              | Angle /° |
|----------------|----------|-------------------|----------|
| C(1)-N(1)-C(5) | 120.7(3) | C(13)-C(8)-C(7)   | 122.2(2) |
| C(7)-N(1)-C(1) | 132.0(2) | C(13)-C(8)-C(9)   | 118.9(3) |
| C(7)-N(1)-C(5) | 107.2(2) | C(10)-C(9)-C(8)   | 120.7(3) |
| C(7)-N(2)-C(6) | 106.9(3) | C(9)-C(10)-C(11)  | 121.4(3) |
| C(2)-C(1)-N(1) | 119.8(3) | C(10)-C(11)-C(12) | 118.7(3) |
| C(1)-C(2)-C(3) | 120.5(3) | C(10)-C(11)-C(14) | 123.1(3) |
| C(4)-C(3)-C(2) | 120.3(3) | C(14)-C(11)-C(12) | 118.1(3) |
| C(3)-C(4)-C(5) | 119.8(3) | C(13)-C(12)-C(11) | 118.6(3) |
| N(1)-C(5)-C(4) | 118.7(3) | C(17)-C(12)-C(11) | 119.3(3) |
| C(6)-C(5)-N(1) | 104.6(3) | C(17)-C(12)-C(13) | 122.1(3) |
| C(6)-C(5)-C(4) | 136.7(3) | C(8)-C(13)-C(12)  | 121.7(2) |
| N(2)-C(6)-C(5) | 111.0(3) | C(15)-C(14)-C(11) | 121.3(3) |
| N(1)-C(7)-C(8) | 125.7(2) | C(14)-C(15)-C(16) | 120.8(3) |
| N(2)-C(7)-N(1) | 110.2(2) | C(17)-C(16)-C(15) | 119.7(3) |
| N(2)-C(7)-C(8) | 123.9(3) | C(16)-C(17)-C(12) | 120.7(3) |
| C(9)-C(8)-C(7) | 118.7(3) |                   |          |



**Table S10.** Crystallographic data for compounds **3b**

| Project                                     | Parameter                                                     |
|---------------------------------------------|---------------------------------------------------------------|
| Identification code                         | 202209167                                                     |
| Empirical formula                           | C <sub>14</sub> H <sub>8</sub> F <sub>3</sub> IN <sub>2</sub> |
| Formula weight                              | 388.12                                                        |
| Temperature/K                               | 293(2)                                                        |
| Crystal system                              | monoclinic                                                    |
| Space group                                 | C2/c                                                          |
| a/Å                                         | 24.8694(3)                                                    |
| b/Å                                         | 7.34027(12)                                                   |
| c/Å                                         | 15.1137(2)                                                    |
| $\alpha$ /°                                 | 90                                                            |
| $\beta$ /°                                  | 102.0839(13)                                                  |
| $\gamma$ /°                                 | 90                                                            |
| Volume/Å <sup>3</sup>                       | 2697.85(7)                                                    |
| Z                                           | 8                                                             |
| $\rho$ calcg/cm <sup>3</sup>                | 1.911                                                         |
| $\mu$ /mm <sup>-1</sup>                     | 18.920                                                        |
| F(000)                                      | 1488.0                                                        |
| Crystal size/mm <sup>3</sup>                | 0.17 × 0.1 × 0.08                                             |
| Radiation                                   | CuK $\alpha$ ( $\lambda$ = 1.54184)                           |
| 2 $\theta$ range for data collection/°      | 7.27 to 141.938                                               |
| Index ranges                                | -30 ≤ h ≤ 30, -7 ≤ k ≤ 8, -18 ≤ l ≤ 16                        |
| Reflections collected                       | 10691                                                         |
| Independent reflections                     | 2577 [R <sub>int</sub> = 0.0424, R <sub>sigma</sub> = 0.0330] |
| Data/restraints/parameters                  | 2577/54/191                                                   |
| Goodness-of-fit on F <sup>2</sup>           | 1.102                                                         |
| Final R indexes [ $I$ ≥ 2 $\sigma$ ( $I$ )] | R <sub>1</sub> = 0.0455, wR <sub>2</sub> = 0.1178             |
| Final R indexes [all data]                  | R <sub>1</sub> = 0.0494, wR <sub>2</sub> = 0.1224             |
| Largest diff. peak/hole / e Å <sup>-3</sup> | 0.57/-1.70                                                    |

**Table S11.** Bond lengths for single crystal **3b**

| Atom        | Length/Å  | Atom        | Length/Å |
|-------------|-----------|-------------|----------|
| I(1)-C(6)   | 2.069(4)  | C(2)-C(3)   | 1.425(7) |
| F(1)-C(14)  | 1.337(8)  | C(3)-C(4)   | 1.344(7) |
| F(1A)-C(14) | 1.315(14) | C(4)-C(5)   | 1.416(5) |
| F(2)-C(14)  | 1.334(9)  | C(5)-C(6)   | 1.369(6) |
| F(2A)-C(14) | 1.285(14) | C(7)-C(8)   | 1.462(5) |
| F(3)-C(14)  | 1.312(8)  | C(8)-C(9)   | 1.399(5) |
| F(3A)-C(14) | 1.356(14) | C(8)-C(13)  | 1.388(6) |
| N(1)-C(1)   | 1.387(5)  | C(9)-C(10)  | 1.372(6) |
| N(1)-C(5)   | 1.403(5)  | C(10)-C(11) | 1.394(7) |
| N(1)-C(7)   | 1.376(4)  | C(11)-C(12) | 1.383(7) |
| N(2)-C(6)   | 1.356(5)  | C(11)-C(14) | 1.490(6) |
| N(2)-C(7)   | 1.333(5)  | C(12)-C(13) | 1.390(7) |
| C(1)-C(2)   | 1.342(6)  |             |          |

**Table S12.** Bond angles for single crystal **3b**

| Atom            | Angle/°  | Atom              | Angle/°   |
|-----------------|----------|-------------------|-----------|
| C(1)-N(1)-C(5)  | 120.8(3) | C(10)-C(9)-C(8)   | 121.3(4)  |
| C(7)-N(1)-C(1)  | 132.0(3) | C(9)-C(10)-C(11)  | 119.6(4)  |
| C(7)-N(1)-C(5)  | 106.8(3) | C(10)-C(11)-C(14) | 120.1(4)  |
| C(7)-N(2)-C(6)  | 105.8(3) | C(12)-C(11)-C(10) | 120.2(4)  |
| C(2)-C(1)-N(1)  | 119.2(4) | C(12)-C(11)-C(14) | 119.7(5)  |
| C(1)-C(2)-C(3)  | 121.2(4) | C(11)-C(12)-C(13) | 119.5(4)  |
| C(4)-C(3)-C(2)  | 120.1(4) | C(8)-C(13)-C(12)  | 121.1(4)  |
| C(3)-C(4)-C(5)  | 119.8(4) | F(1)-C(14)-C(11)  | 113.1(5)  |
| N(1)-C(5)-C(4)  | 118.6(4) | F(1A)-C(14)-F(3A) | 96.1(13)  |
| C(6)-C(5)-N(1)  | 104.6(3) | F(1A)-C(14)-C(11) | 113.8(10) |
| C(6)-C(5)-C(4)  | 136.9(4) | F(2)-C(14)-F(1)   | 102.5(6)  |
| N(2)-C(6)-I(1)  | 122.3(3) | F(2)-C(14)-C(11)  | 111.5(7)  |
| N(2)-C(6)-C(5)  | 112.0(3) | F(2A)-C(14)-F(1A) | 115.2(17) |
| C(5)-C(6)-I(1)  | 125.7(3) | F(2A)-C(14)-F(3A) | 103.3(19) |
| N(1)-C(7)-C(8)  | 126.2(3) | F(2A)-C(14)-C(11) | 118(2)    |
| N(2)-C(7)-N(1)  | 110.9(3) | F(3)-C(14)-F(1)   | 108.6(7)  |
| N(2)-C(7)-C(8)  | 122.7(3) | F(3)-C(14)-F(2)   | 104.6(7)  |
| C(9)-C(8)-C(7)  | 118.9(3) | F(3)-C(14)-C(11)  | 115.3(6)  |
| C(13)-C(8)-C(7) | 122.6(3) | F(3A)-C(14)-C(11) | 106.1(14) |
| C(13)-C(8)-C(9) | 118.3(4) |                   |           |

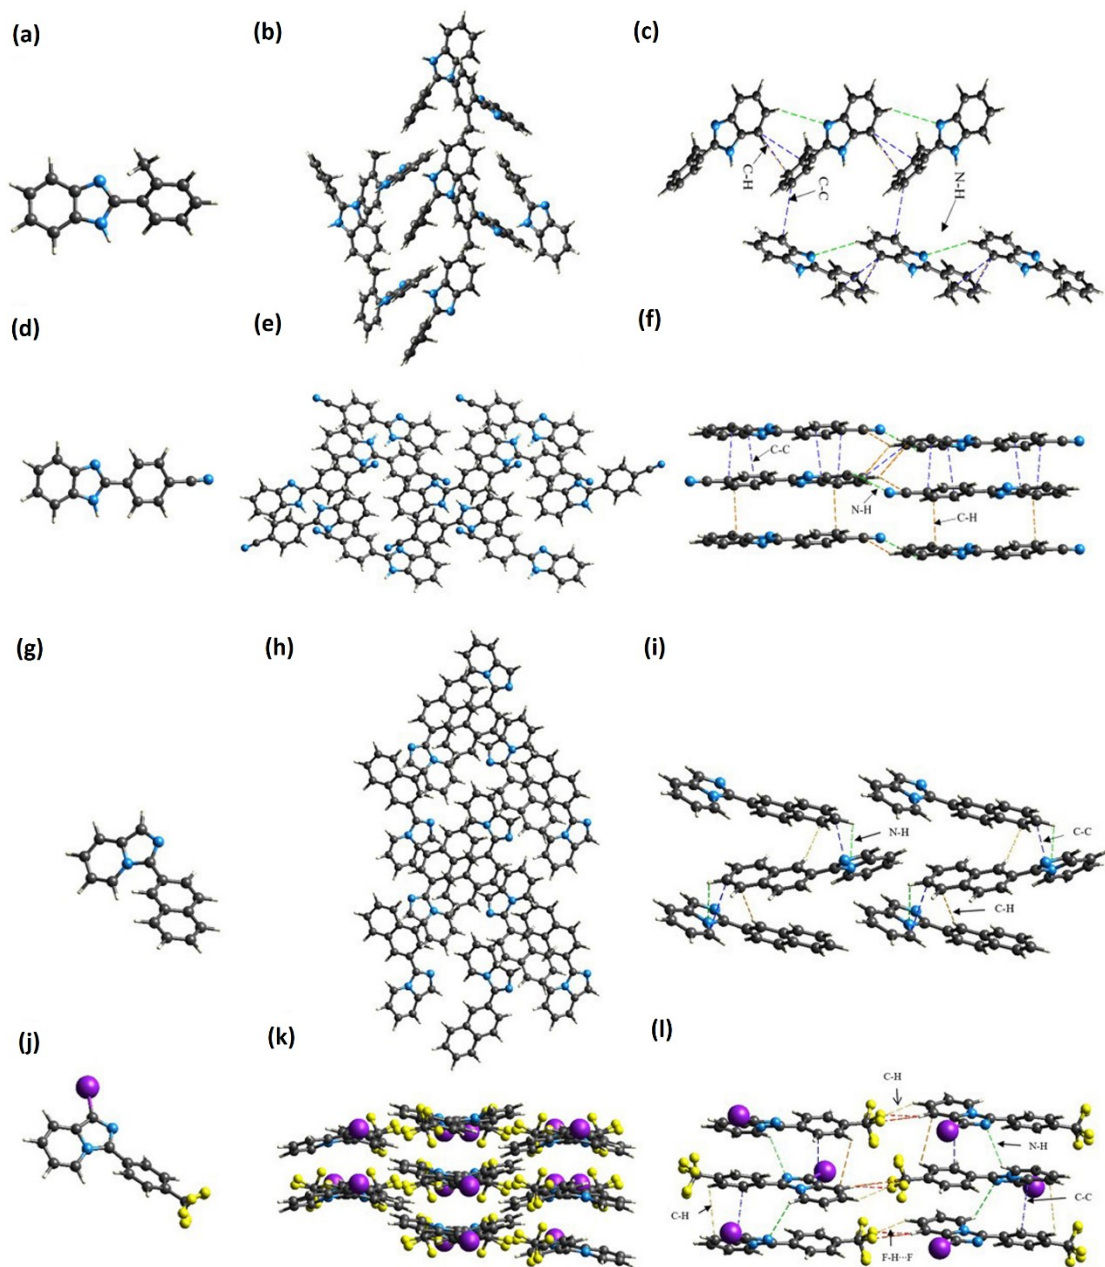

**Figure S1.** (a), (d), (g), (j): Single-crystal structure of **2a**, **2b**, **3a** and **3b** shown in ORTEP; (b), (e), (h), (k): Crystal packing diagram of **2a**, **2b**, **3a** and **3b**; (c), (f), (i), (l): Intermolecular interactions of **2a**, **2b**, **3a** and **3b** in the crystal lattice

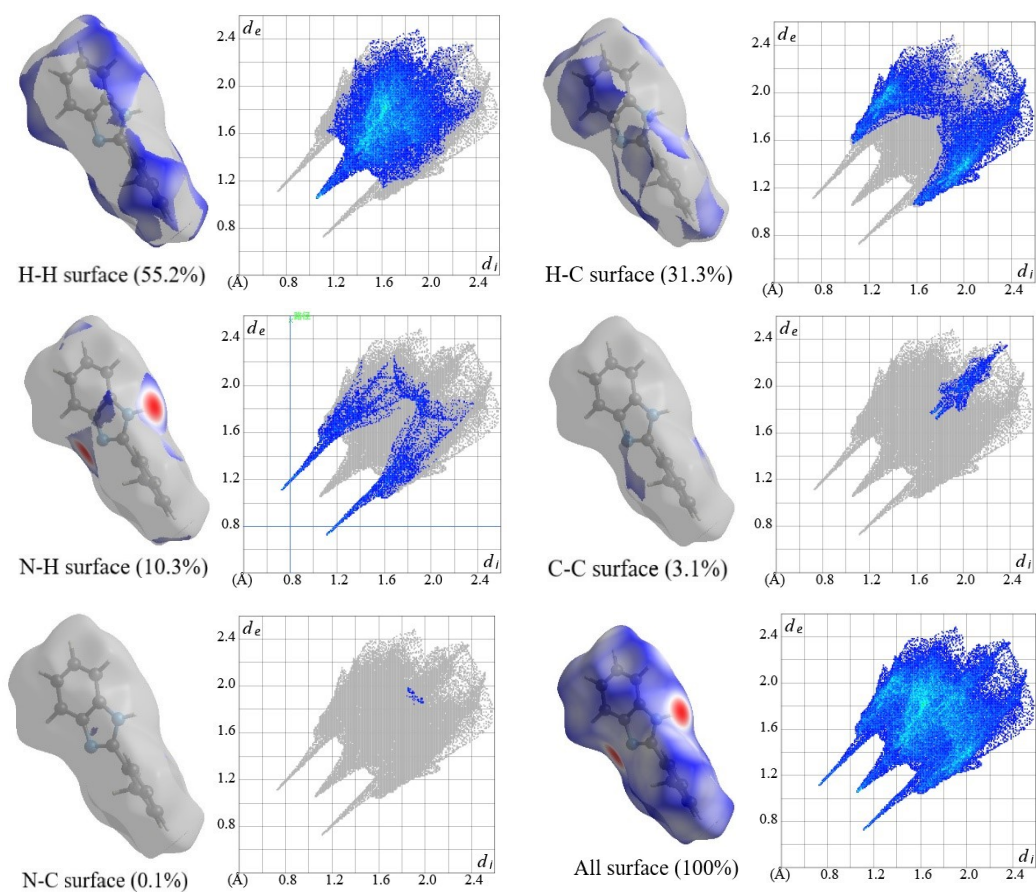

**Figure S2.** 2-D fingerprint plot of different contributions for the title compound **2a**.

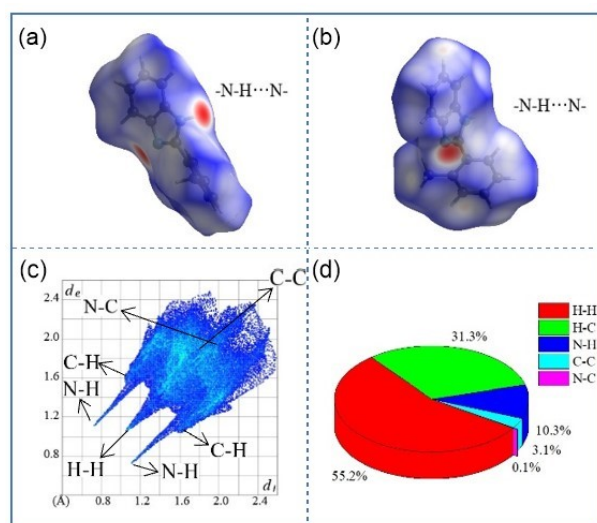

**Figure S3.** Hirshfeld surface ( $d_{\text{norm}}$ ) of **2a** in a-axis (a) and c-axis (b) directions. (c) Fingerprint plot of **2a**. (d) The proportion of the different types of intermolecular interactions in **2a**.

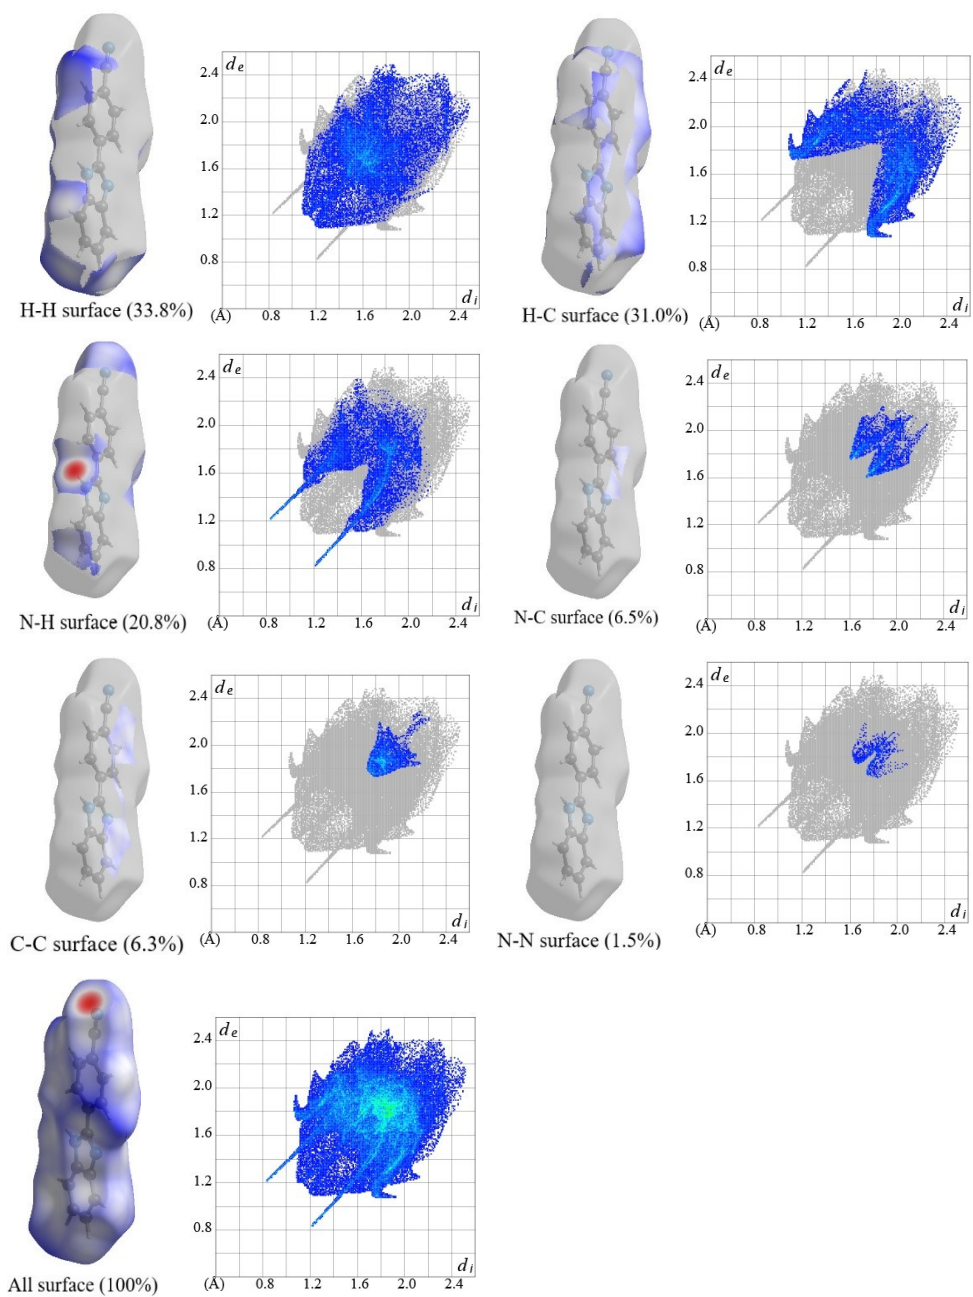

**Figure S4.** 2-D fingerprint plot of different contributions for the title compound **2b**.

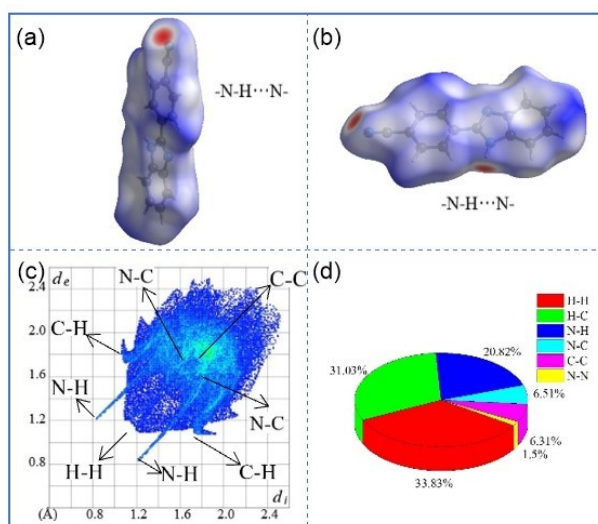

**Figure S5.** Hirshfeld surface ( $d_{\text{norm}}$ ) of **2b** in a-axis (a) and c-axis (b) directions. (c) Fingerprint plot of **2b**. (d) The proportion of the different types of intermolecular interactions in **2b**.

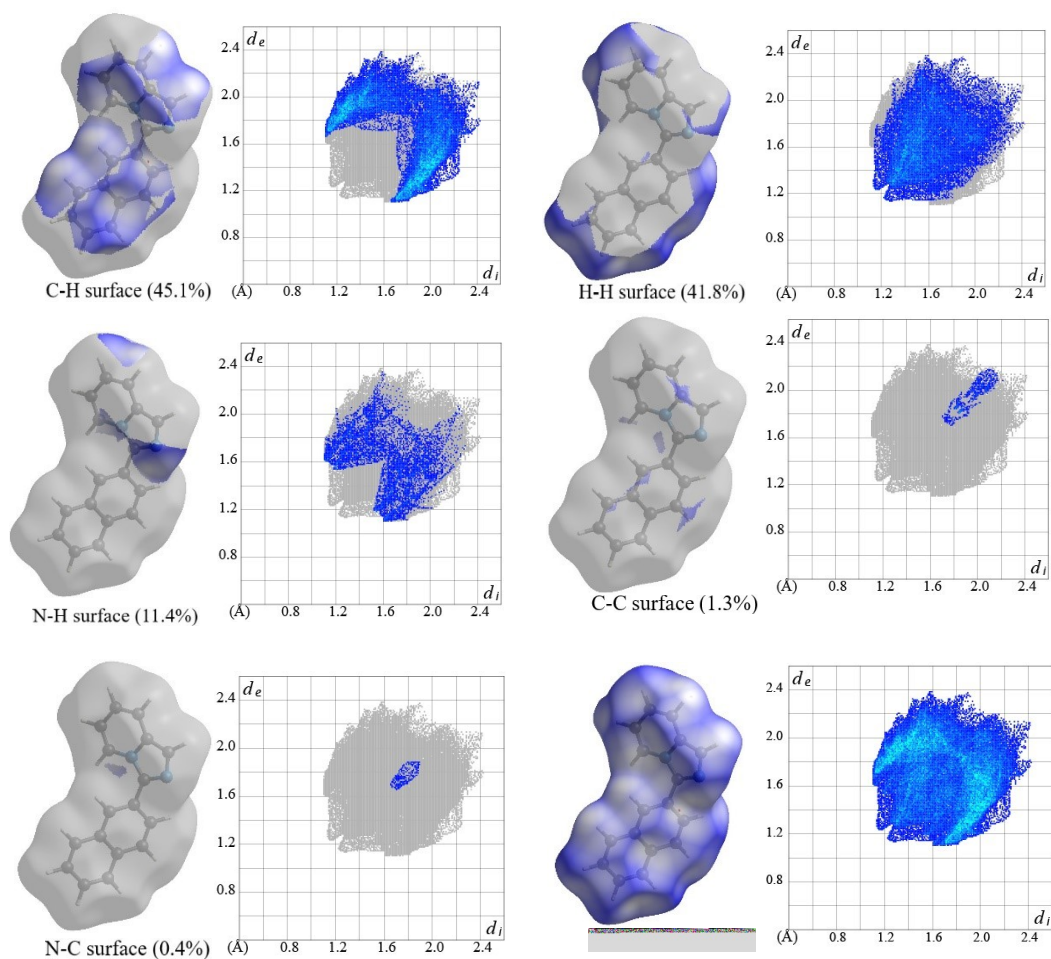

**Figure S6.** 2-D fingerprint plot of different contributions for the title compound **3a**.



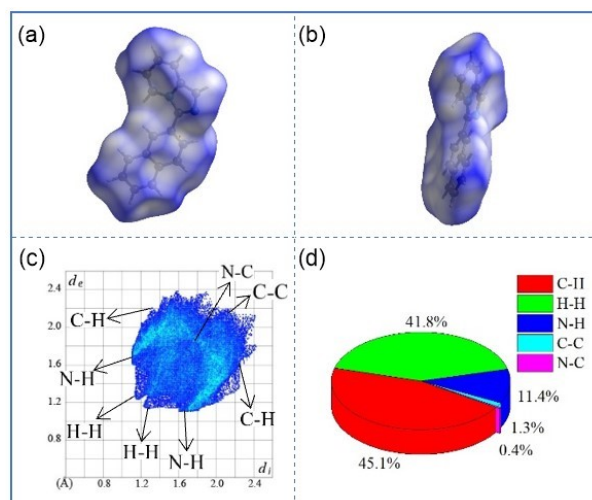

**Figure S7.** Hirshfeld surface ( $d_{\text{norm}}$ ) of **3a** in a-axis (a) and c-axis (b) directions. (c) Fingerprint plot of **3a**. (d) The proportion of the different types of intermolecular interactions in **3a**.

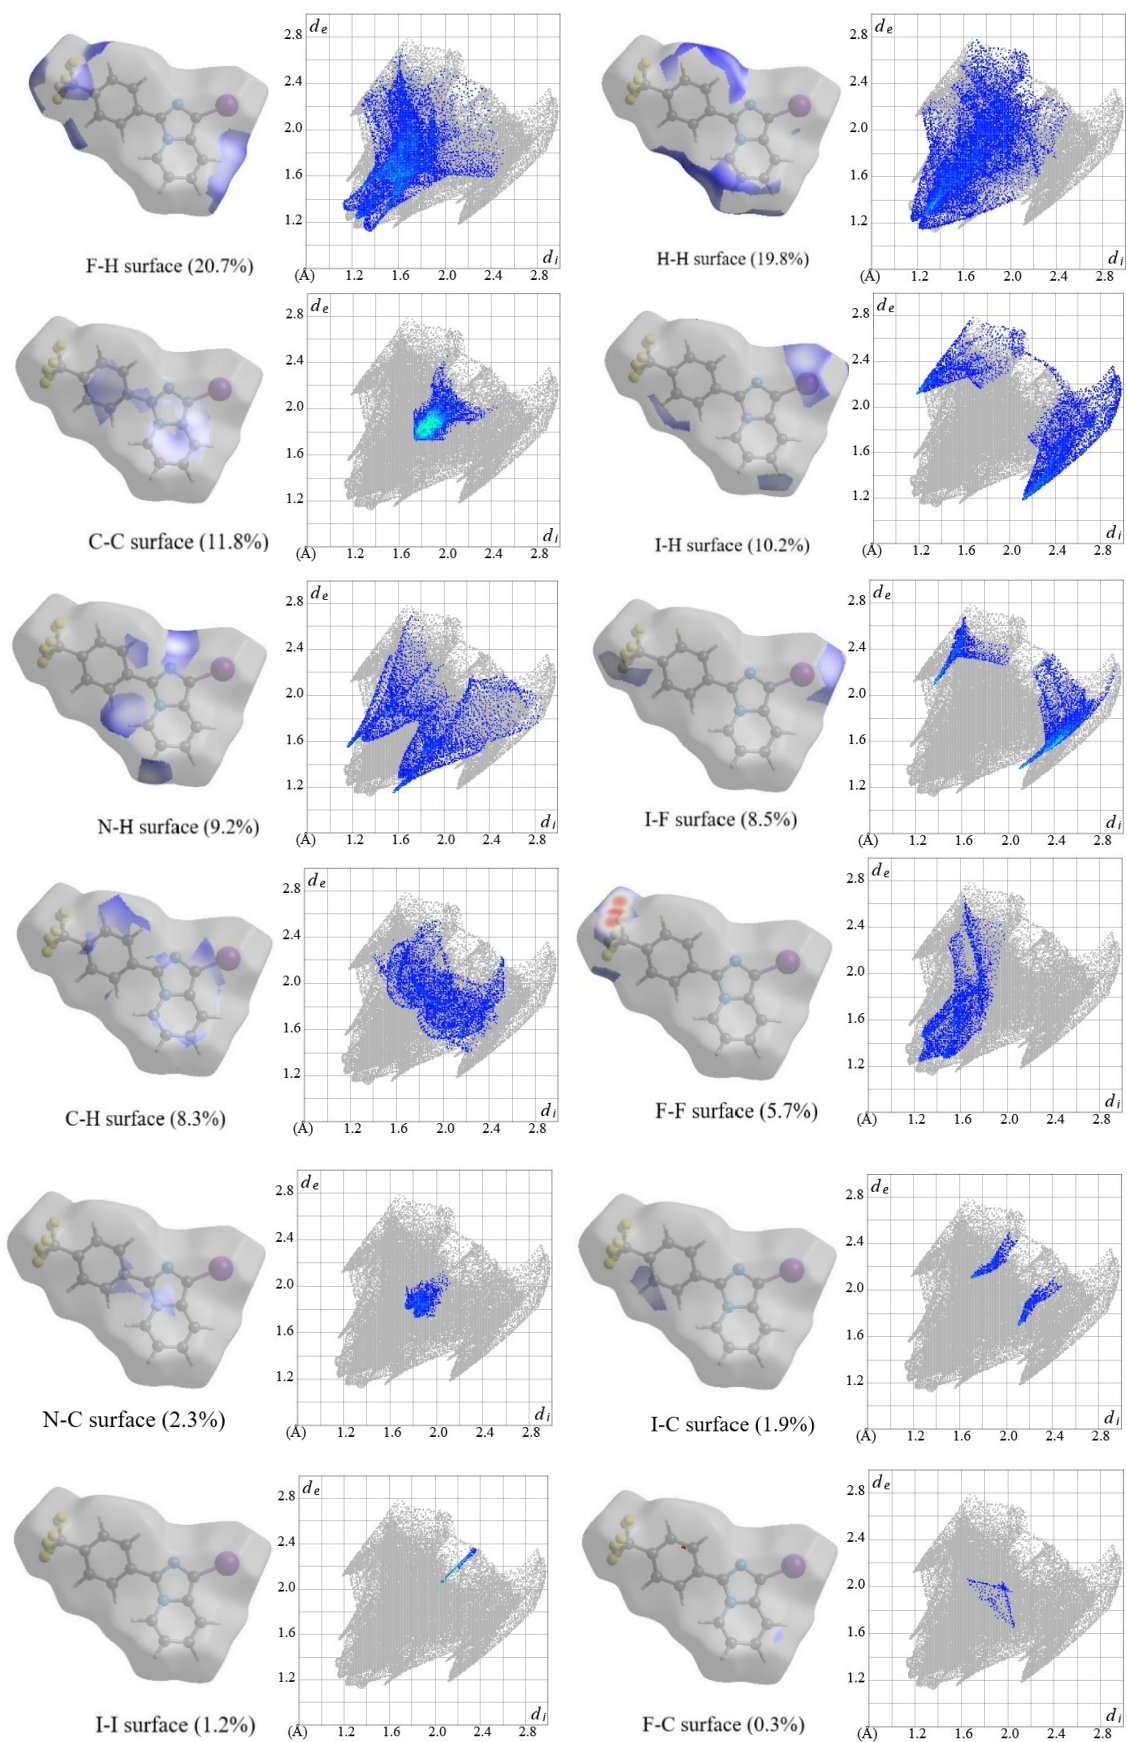

**Figure S8.** 2-D fingerprint plot of different contributions for the title compound **3b**.



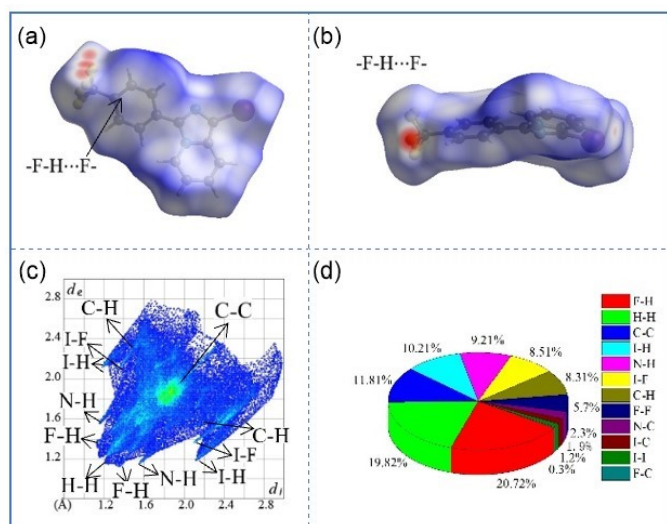

**Figure S9.** Hirshfeld surface ( $d_{\text{norm}}$ ) of **3b** in b-axis (a) and c-axis (b) directions. (c) Fingerprint plot of **3b**. (d) The proportion of the different types of intermolecular interactions in **3b**.

### 3. Frontier molecular orbitals of compound 1a, 1b, 1c, 2a, 2b, 3a and 3b

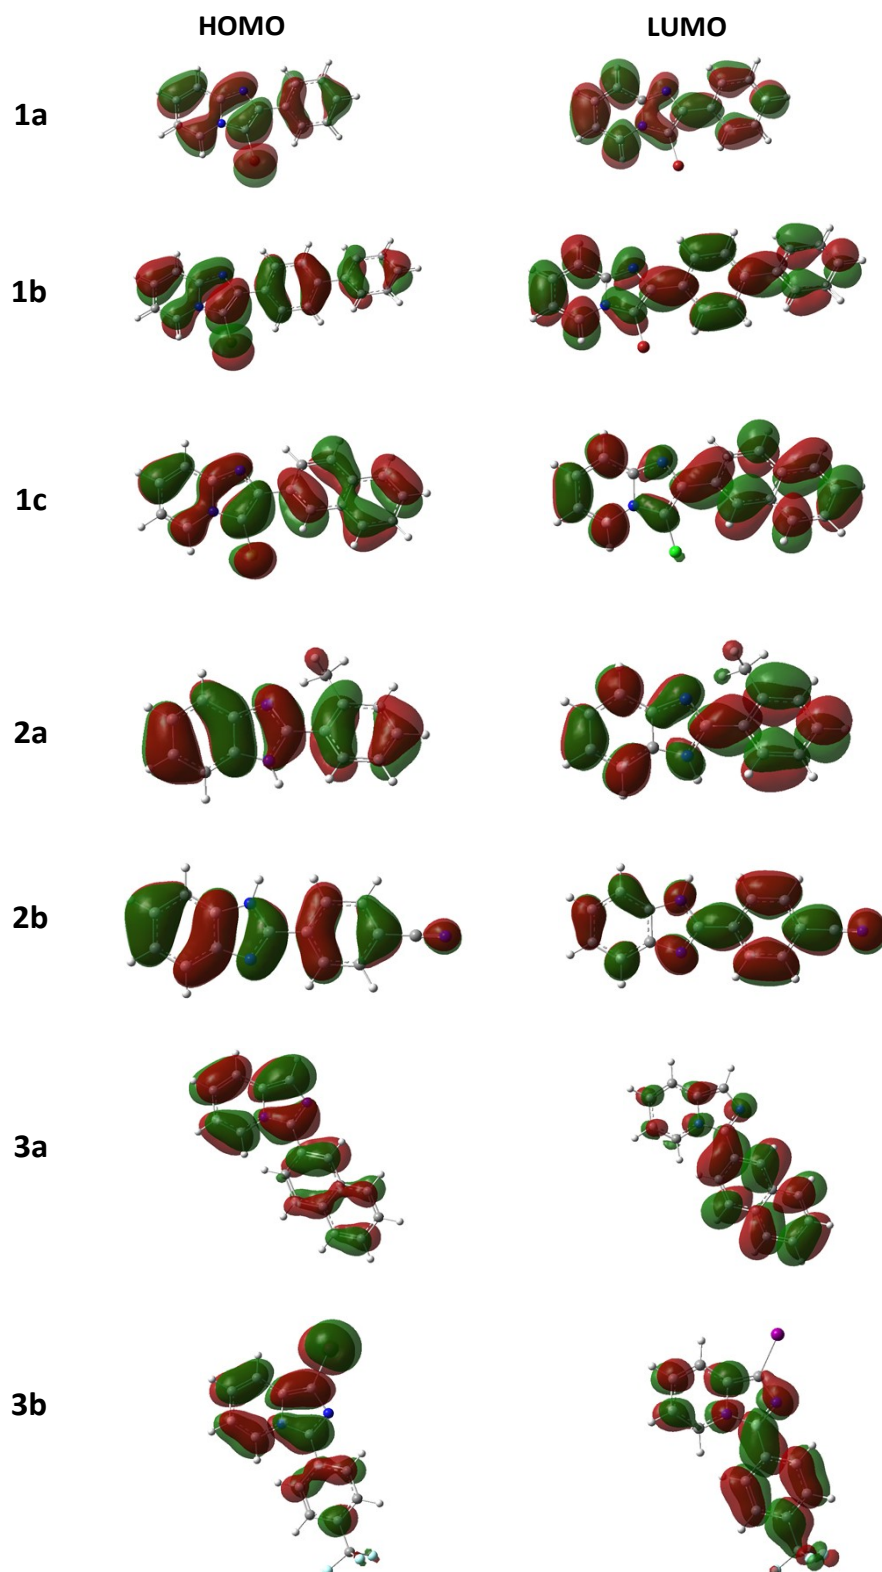

**Figure S10.** Frontier molecular orbitals of compounds **1a**, **1b**, **1c**, **2a**, **2b**, **3a**, and **3b** were obtained by density functional theory calculations at the B3LYP/6-31G (d) level.

#### 4. Absorption and emission spectra of compound 1a, 1b, 1c, 2a, 2b, 3a and 3b in solution

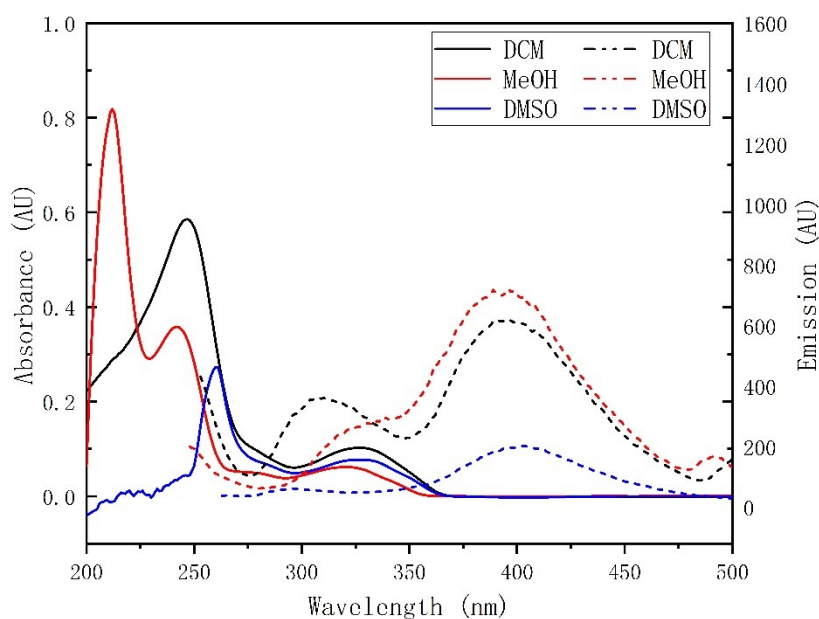

**Figure S11.** Absorption (solid lines, 250–500 nm) and emission (dashed lines, 250–500 nm) spectra of **1a** in three solvents of different polarity (DCM; CH<sub>3</sub>OH; DMSO). The absorption spectra and emission spectra were taken with  $1.0 \times 10^{-5}$  M solutions.

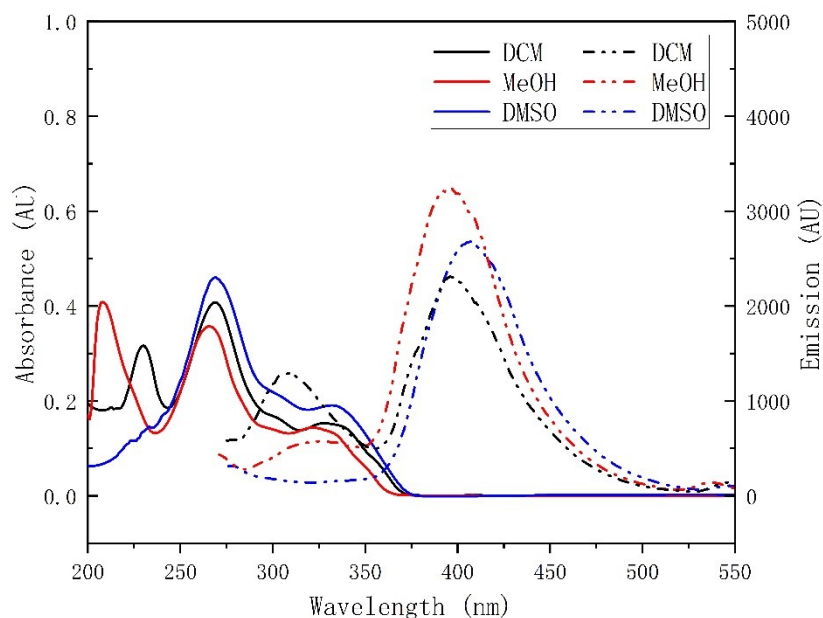

**Figure S12.** Absorption (solid lines, 200–500 nm) and emission (dashed lines, 275–500 nm) spectra of **1b** in three solvents of different polarity (DCM; CH<sub>3</sub>OH; DMSO). The absorption spectra and emission spectra were taken with  $1.0 \times 10^{-5}$  M solutions.

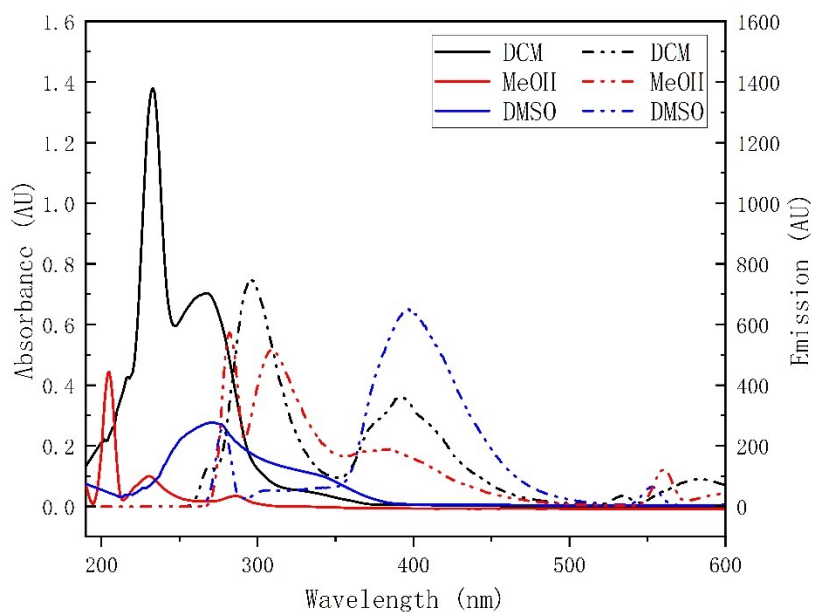

**Figure S13.** Absorption (solid lines, 200-500 nm) and emission (dashed lines, 250–600 nm) spectra of **1c** in three solvents of different polarity (DCM; CH<sub>3</sub>OH; DMSO). The absorption spectra and emission spectra were taken with  $1.0 \times 10^{-5}$  M solutions.

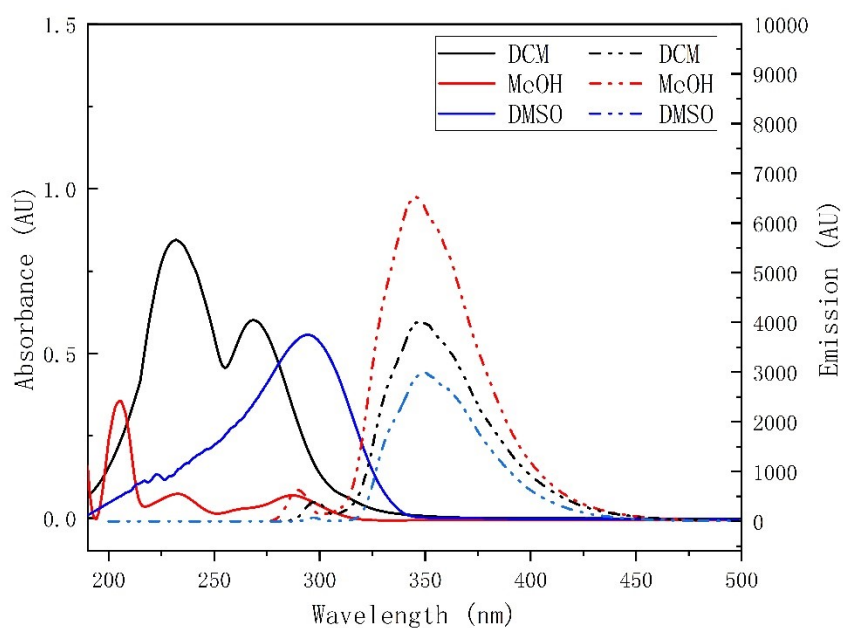

**Figure S14.** Absorption (solid lines, 200-500 nm) and emission (dashed lines, 275–500 nm) spectra of **2a** in three solvents of different polarity (DCM; CH<sub>3</sub>OH; DMSO). The absorption spectra and emission spectra were taken with  $1.0 \times 10^{-5}$  M solutions.

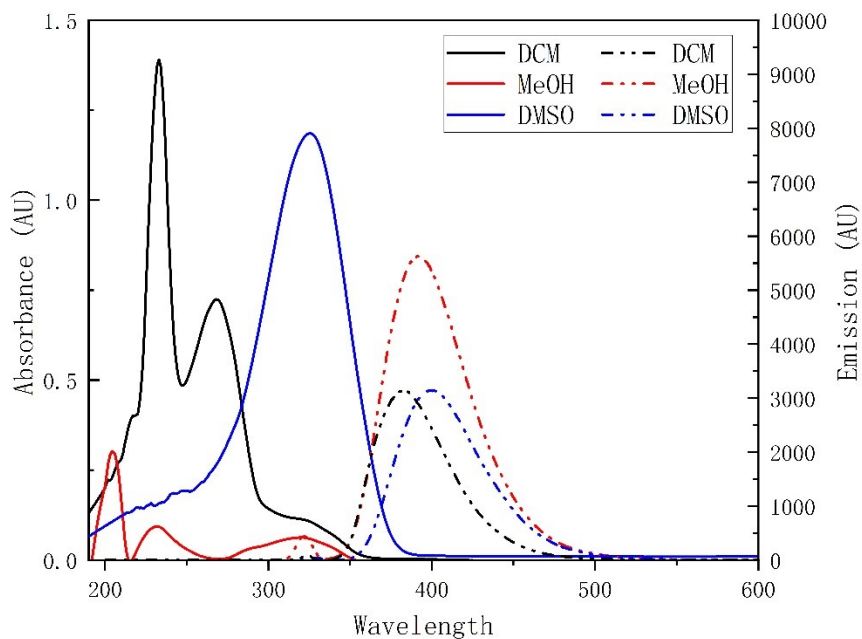

**Figure S15.** Absorption (solid lines, 200–500 nm) and emission (dashed lines, 300–600 nm) spectra of **2b** in three solvents of different polarity (DCM; CH<sub>3</sub>OH; DMSO). The absorption spectra and emission spectra were taken with  $1.0 \times 10^{-5}$  M solutions.

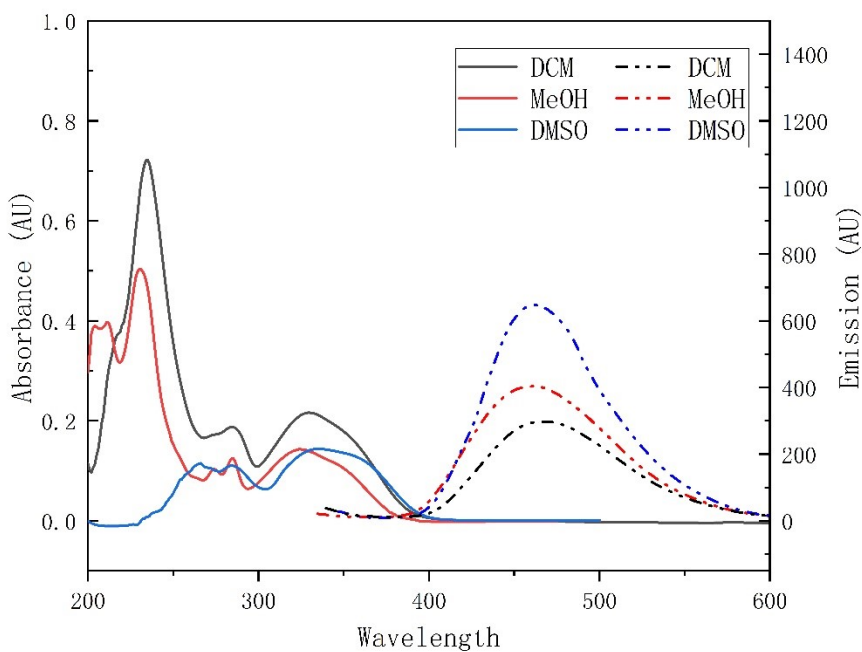

**Figure S16.** Absorption (solid lines, 200–500 nm) and emission (dashed lines, 325–600 nm) spectra of **3a** in three solvents of different polarity (DCM; CH<sub>3</sub>OH; DMSO). The absorption spectra and emission spectra were taken with  $1.0 \times 10^{-5}$  M solutions.

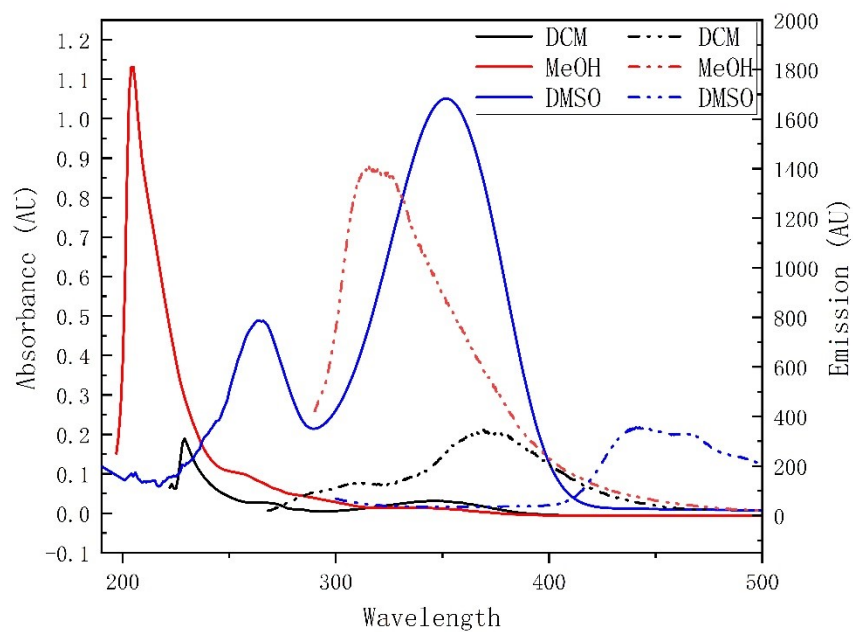

**Figure S17.** Absorption (solid lines, 200–500 nm) and emission (dashed lines, 275–500 nm) spectra of **3b** in three solvents of different polarity (DCM; CH<sub>3</sub>OH; DMSO). The absorption spectra and emission spectra were taken with  $1.0 \times 10^{-5}$  M solutions.
